# Supplementary material
Source: ML conference proceedings conference paper supplement (https://openreview.net/forum?id=kGa4fMtP9l)
Supplement: supplementary_material [file attachment]

Link to anonymized code repo:

<https://anonymous.4open.science/r/USACO-BBC5>
